# Supplementary material for: Psychiatrists' Experiences, Training Needs, and Preferences Regarding Prescription and Management of HIV Pre‐exposure Prophylaxis (PrEP) Within Psychiatric Care
Source: Atypon-hosted journal article supplement (doi:10.1176/appi.prcp.20240069), 2024-09-18
Supplement: rcp21102-sup-0001-suppl-data.pdf [file rcp21102-sup-0001-suppl-data.pdf]

Supplemental Figure 1.

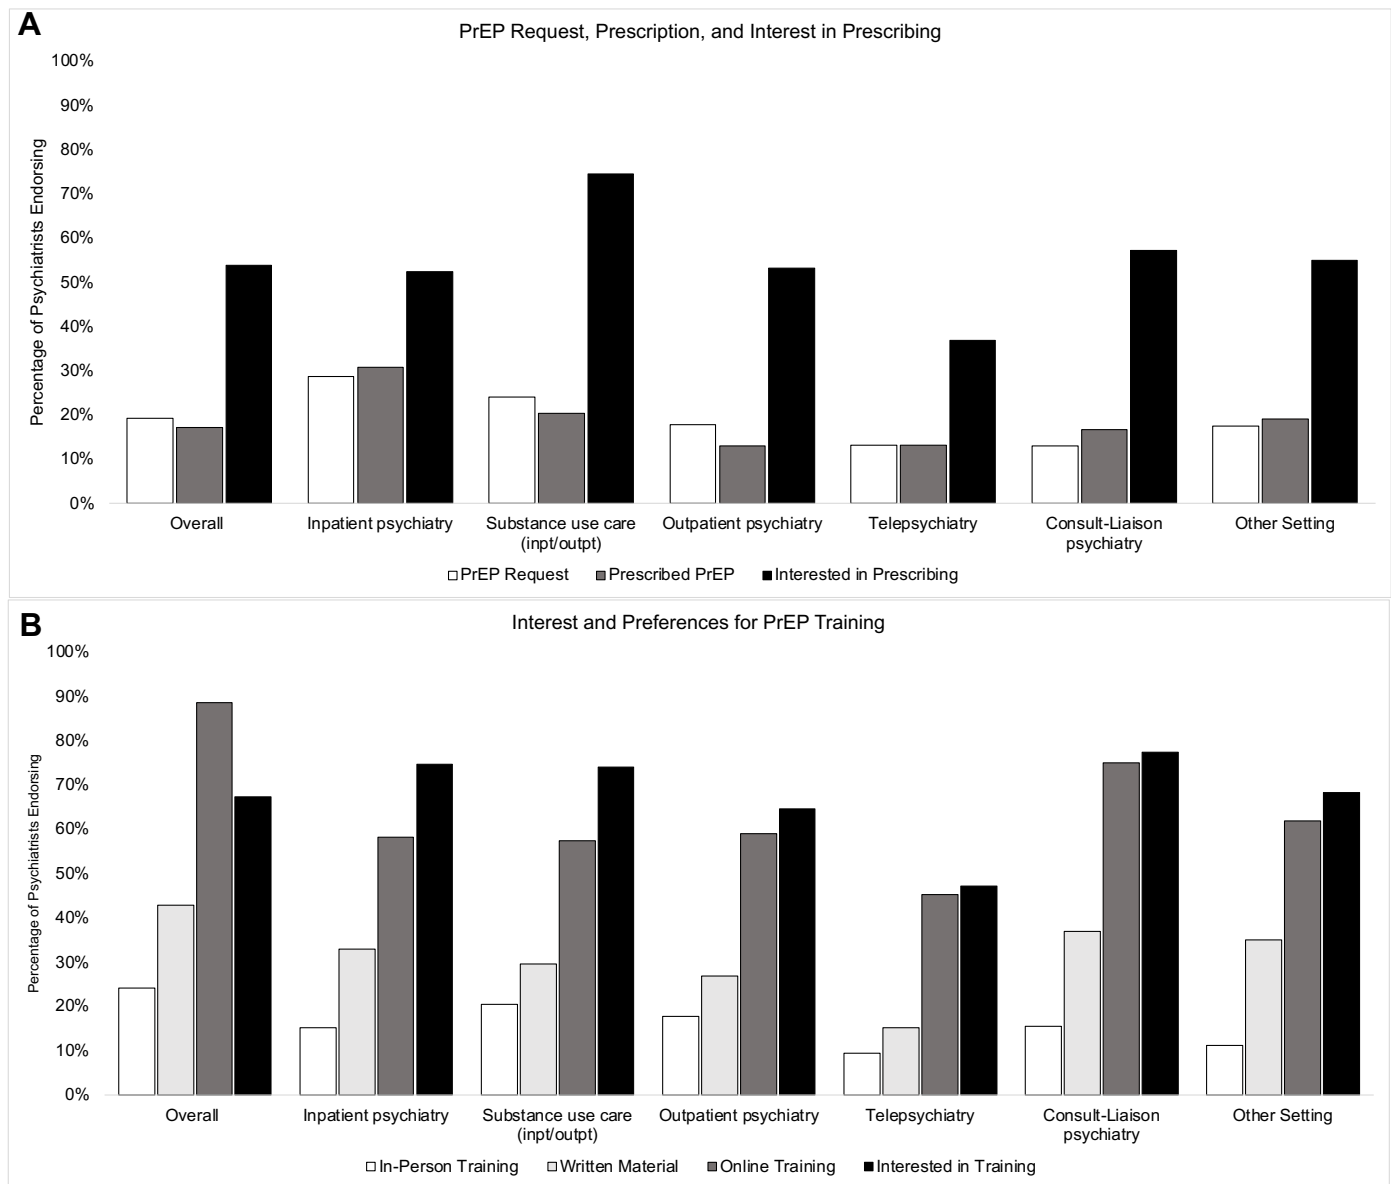

Supplemental Figure 1 Caption: A: Percentage of psychiatrists across primary practice settings who indicated previous patient request for PrEP, prior PrEP prescription, and who were interested in prescribing PrEP. B: Percentage of psychiatrists across primary practice settings who indicated interest in training about PrEP and preferences for methods of PrEP training.

Supplemental Figure 2.

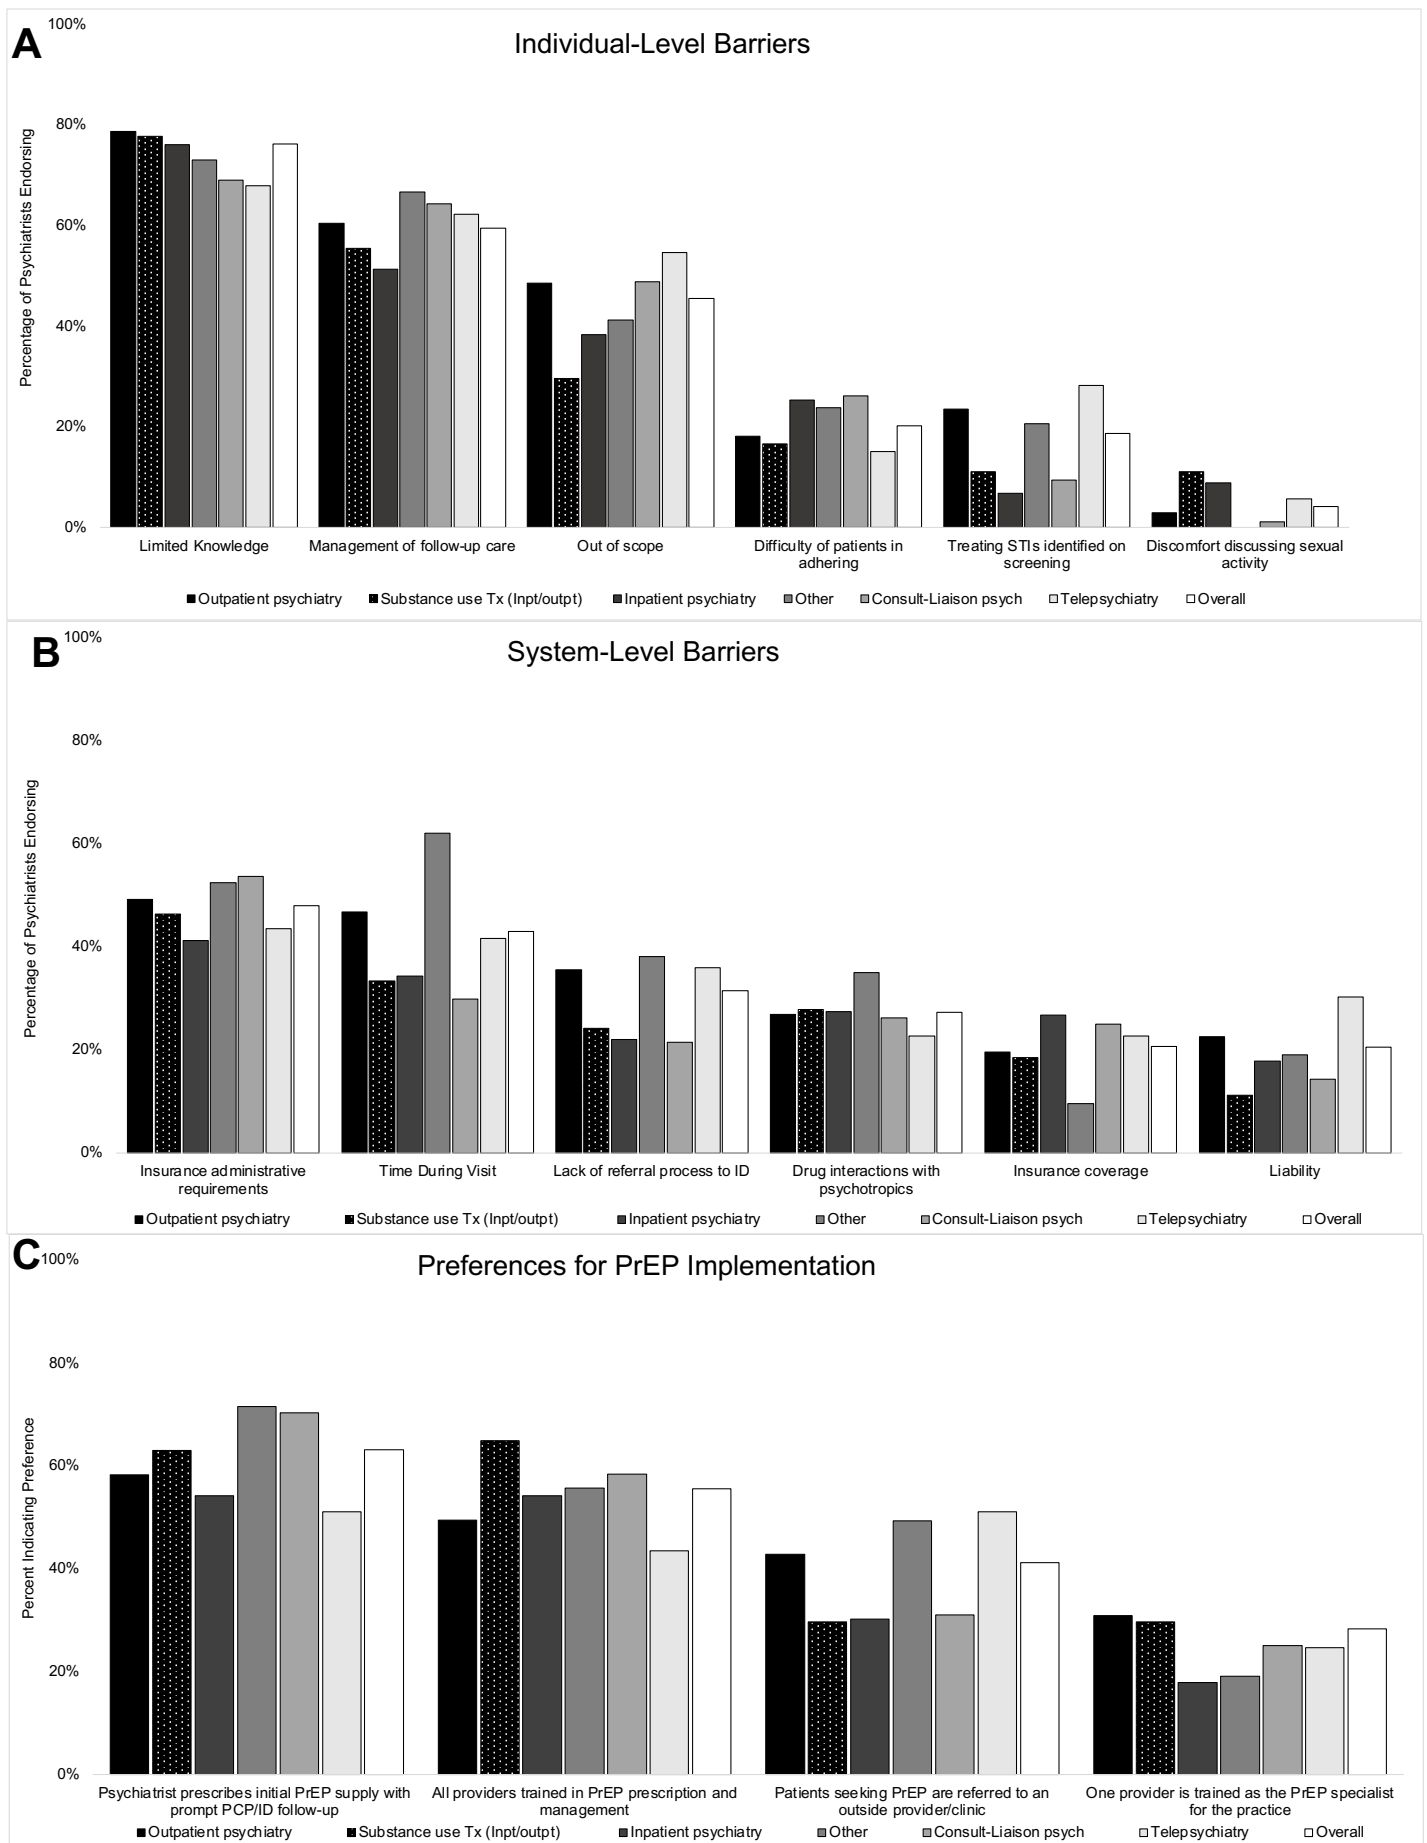

Supplemental Figure 2 Caption: **A.** Percentage of psychiatrists across primary practice settings who endorsed each individual-level barrier to PrEP prescription in their practice. Participants were allowed to select all barriers that applied. **B.** Percentage of psychiatrists across primary practice settings who endorsed each system-level barrier to PrEP prescription in their practice. Participants were allowed to select all barriers that applied. **C.** Percentage of psychiatrists who indicated that each hypothetical model of PrEP implementation in their practice would be acceptable across primary practice settings. Participants were allowed to select all models they felt would be acceptable. ID = Infectious Disease, PCP = Primary Care Physician, STI = Sexually Transmitted Infection
